# Supplementary material for: Cytotoxicity of sophorolipid-gellan gum-gold nanoparticle conjugates and their doxorubicin loaded derivatives towards human glioma and human glioma stem cell lines
Source: Royal Society of Chemistry journal article supplement (doi:10.1039/c0nr00598c), 2010-11-11

**Electronic Supplementary Information**

**Cytotoxicity of sophorolipid-gellan gum-gold nanoparticle conjugates and their  
doxorubicin loaded derivatives towards human glioma and human glioma stem  
cell lines**

**Fig. S1:** Z stacking images to show the uptake of Texas red labeled sophorolipid gold nanoparticles in human glioma LN229 cells.

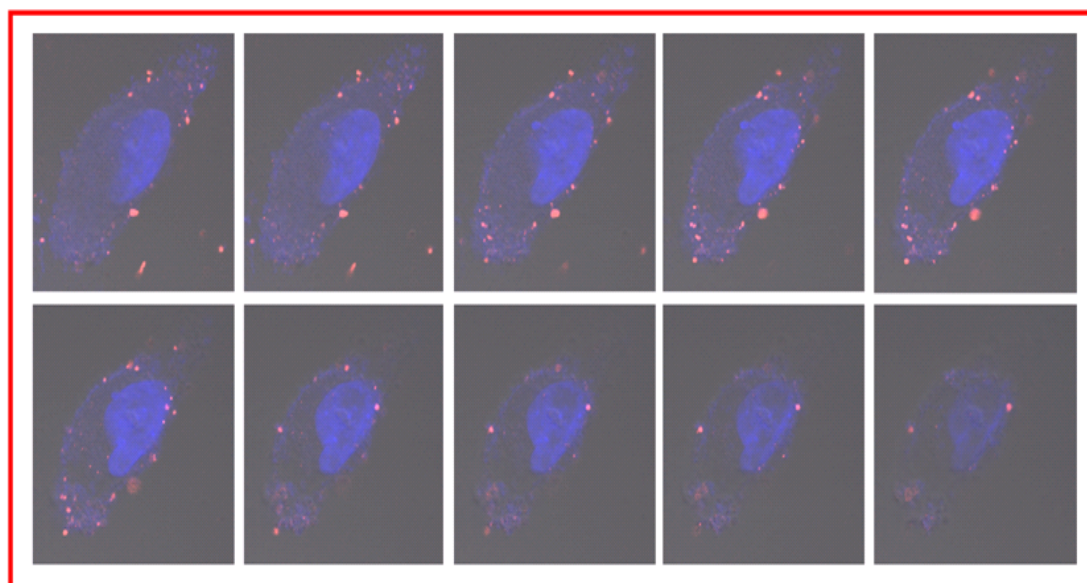

**Fig. S2.** Thermogravimetry analysis data obtained from powders of (a) Gellan Gum reduced gold nanoparticles (b) SL loaded GG reduced gold nanoparticles and (c) DOX-SL-GG-gold nanoparticle conjugates.

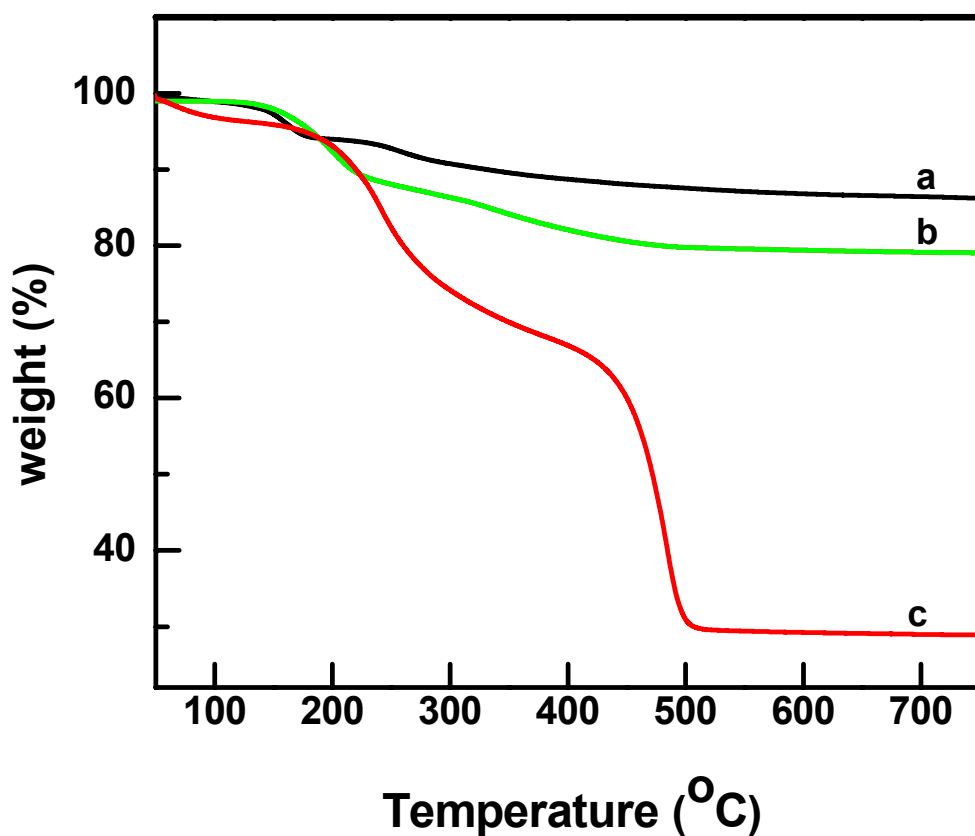

**Fig. S3. (A)** Fluorescence spectra of doxorubicin loaded sophorolipid gold nanoparticles **(a)** doxorubicin solution and **(b)** doxorubicin loaded sophorolipid gold nanoparticles **(B)** Stability study doxorubicin loaded sophorolipid gold nanoparticles,  $t=3$  months.

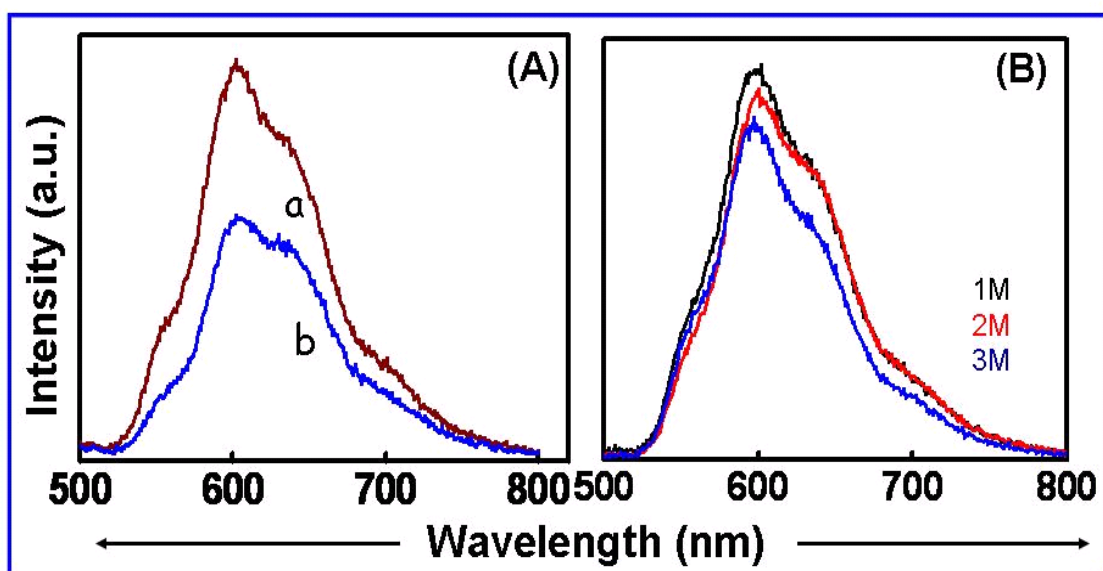

Supplement: c0nr00598c.pdf [file c0nr00598c.pdf]
